# Supplementary material
Source: HighWire-hosted journal article supplement (https://thorax.bmj.com/content/thorax-2024-222073)

10 PM

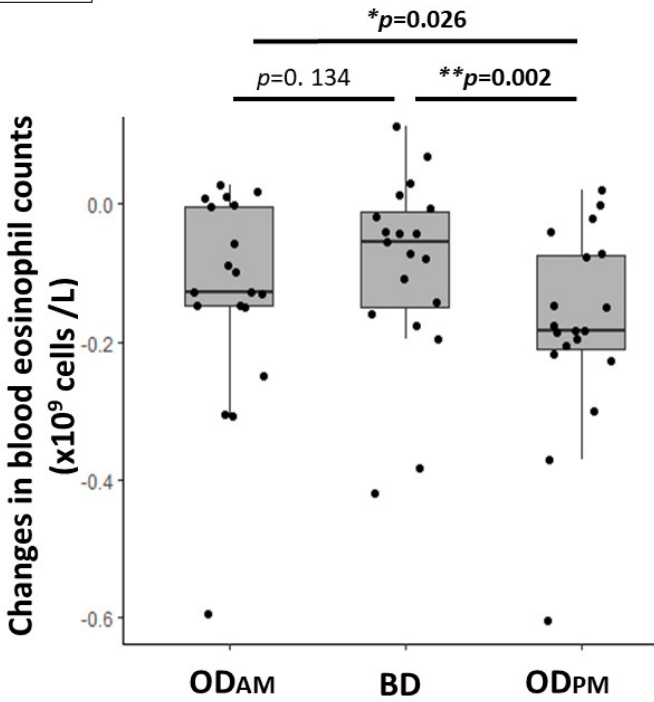

4 AM

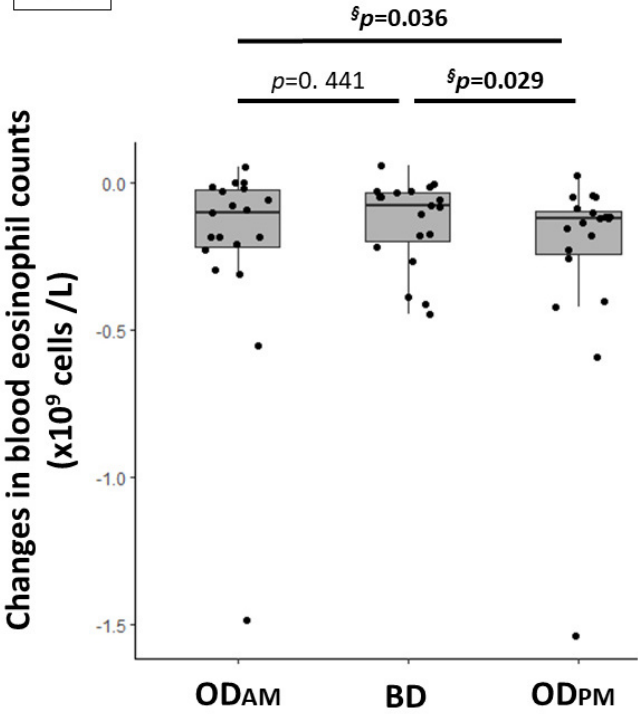

Supplement: inline-supplementary-material-15 [file inline-supplementary-material-15.pdf]
