# Supplementary material
Source: HighWire-hosted journal article supplement (https://thorax.bmj.com/content/thorax-2024-222073)

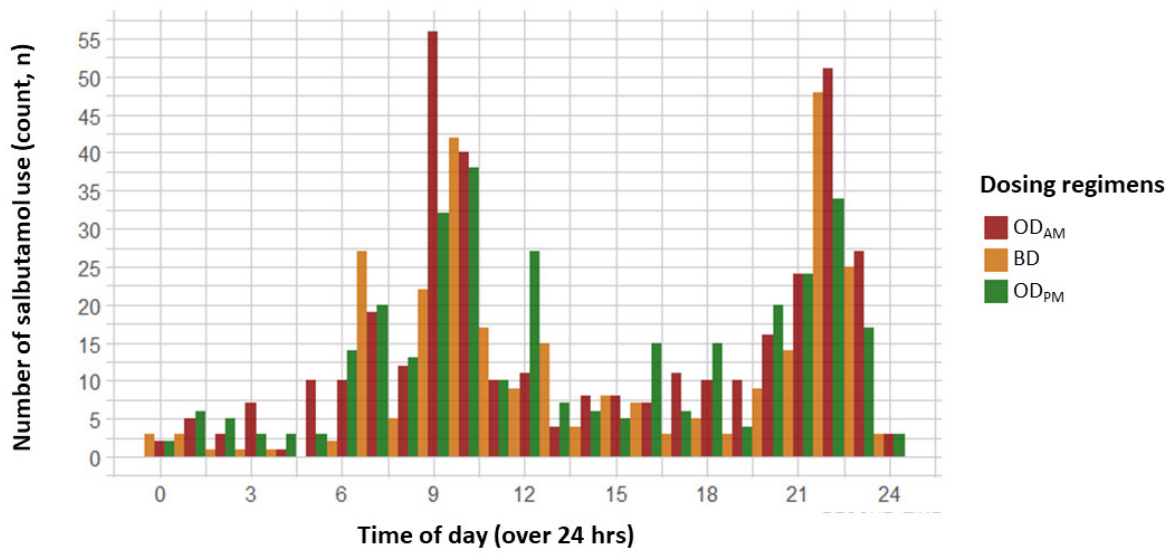

Supplement: inline-supplementary-material-22 [file inline-supplementary-material-22.pdf]
